# Supplementary material
Source: PubMed Central journal article supplement (PMC6453703)

Figure S1

KCl-mediated depolarization increases GCaMP6s fluorescence in aromatase+ BNSTpr neurons in acute adult slices

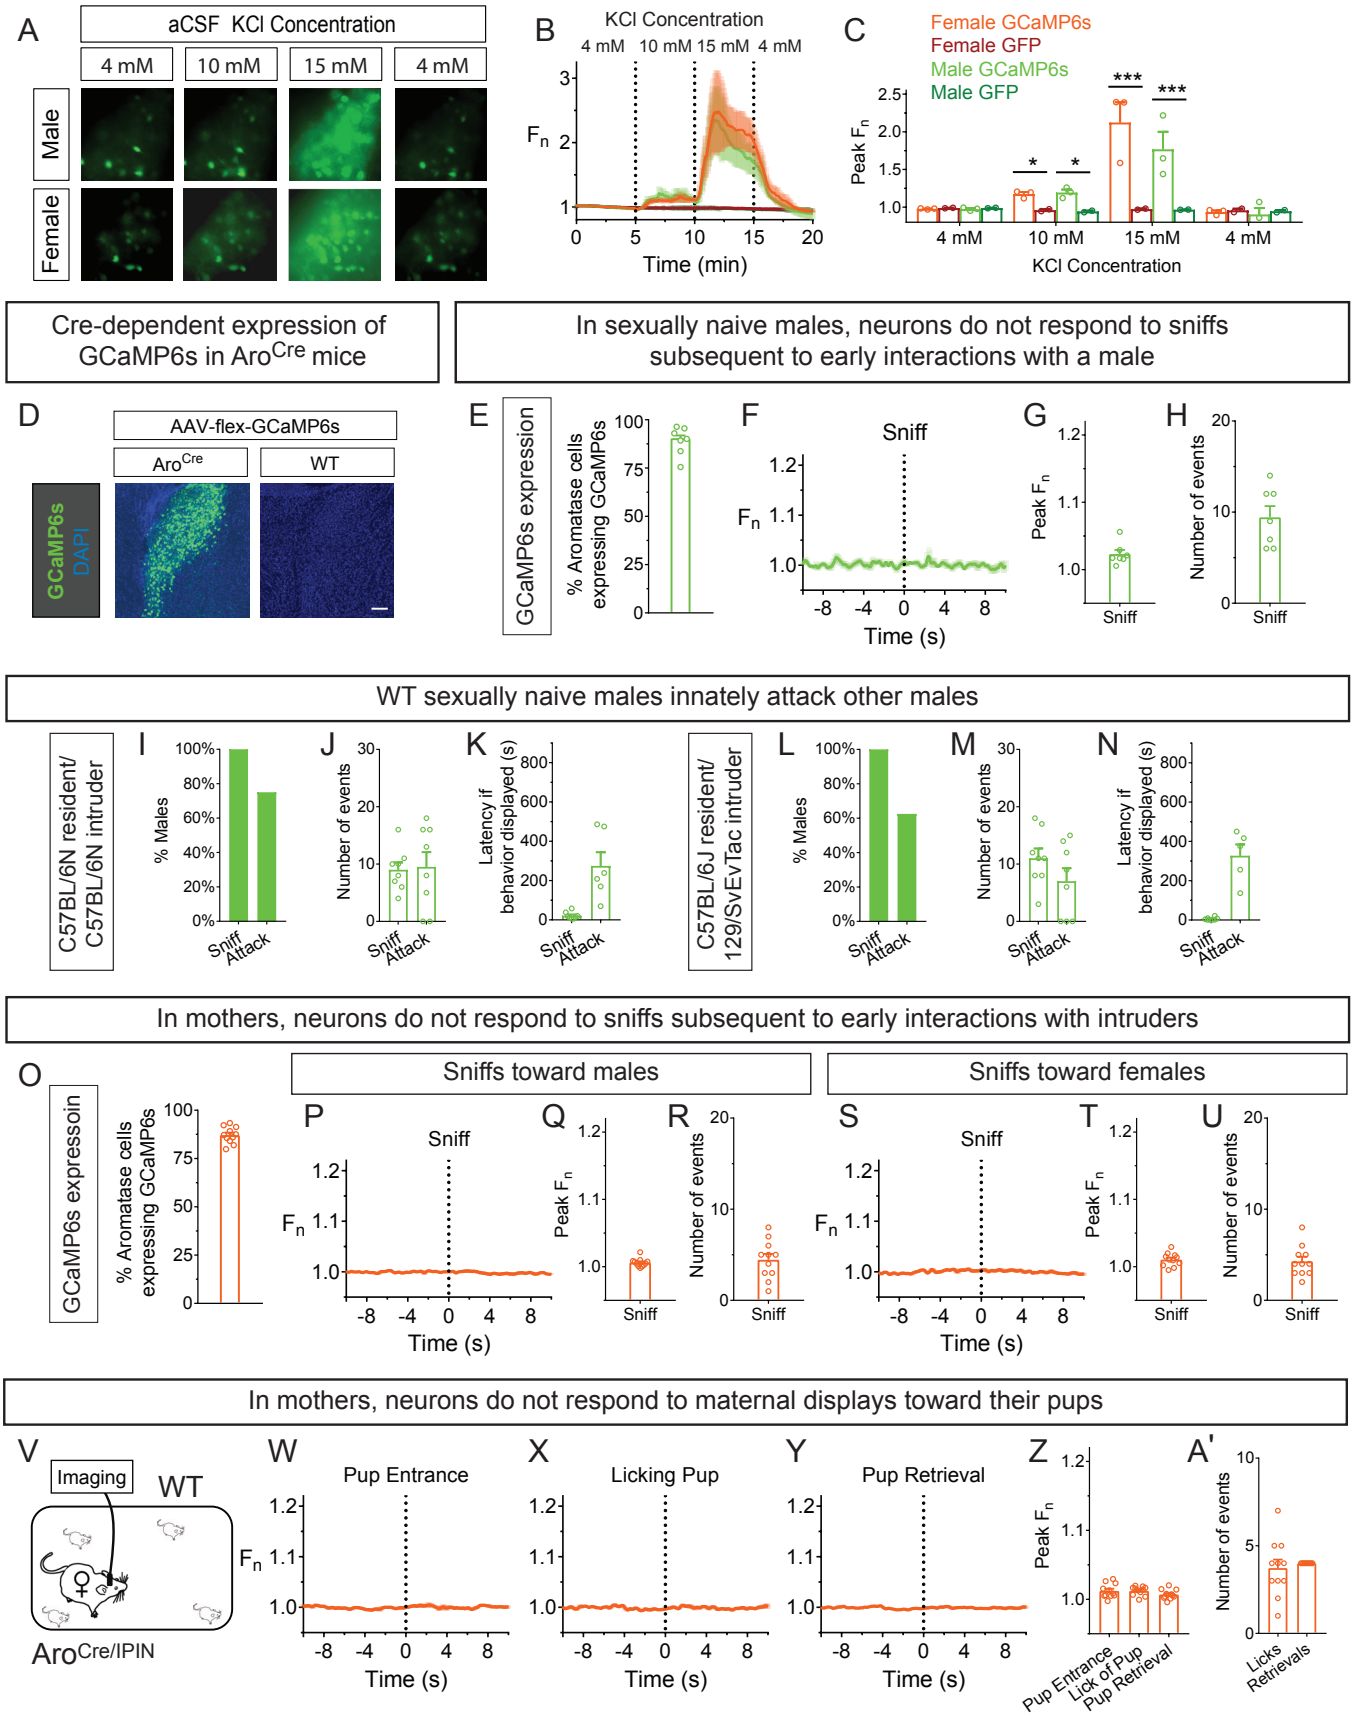

Supplement: NIHMS1517718-supplement-1.pdf [file NIHMS1517718-supplement-1.pdf]
