# Supplementary material
Source: PubMed Central journal article supplement (PMC6453703)

Figure S2

In sexually naive males, neurons do not respond to sniffs subsequent to early investigation of females

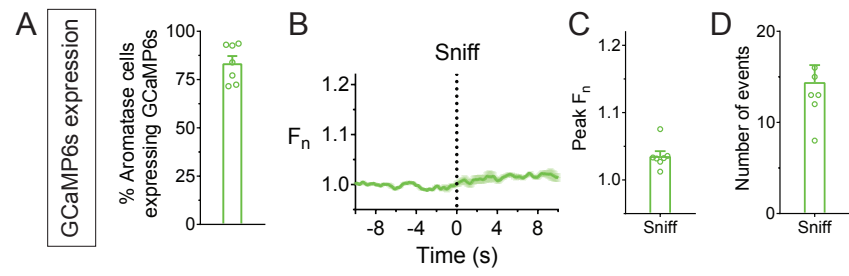

In sexually naive receptive females, neurons do not respond to sniffs or lordosis behavior

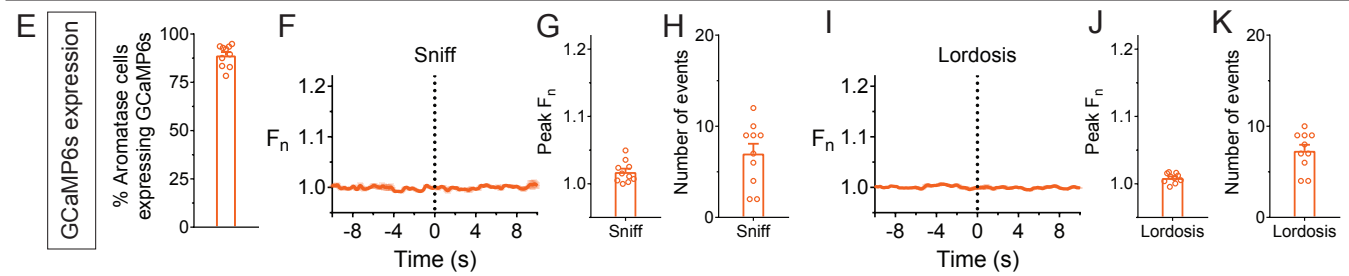

In receptive females, neurons do not respond to intruders of either sex

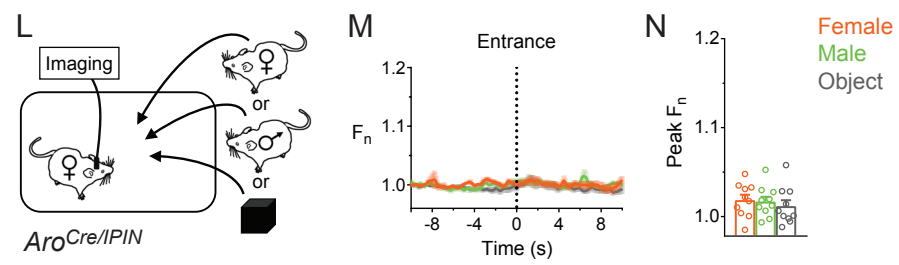

Most neurons in the BNST are GABAergic

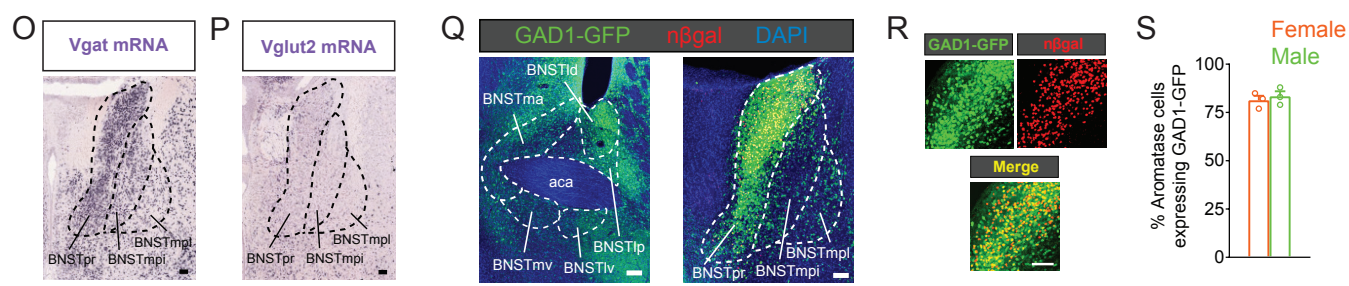

In sexually naive receptive females, Vgat+ neurons in and around the BNST respond during mating

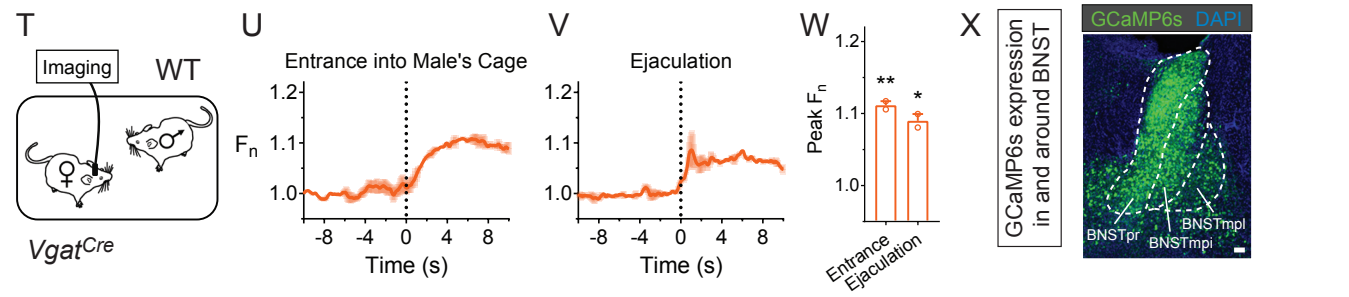

Supplement: NIHMS1517718-supplement-2.pdf [file NIHMS1517718-supplement-2.pdf]
