# Supplementary material
Source: PubMed Central journal article supplement (PMC6453703)

Figure S5

In males, chemogenetic inhibition of neurons does not lead to pervasive deficits

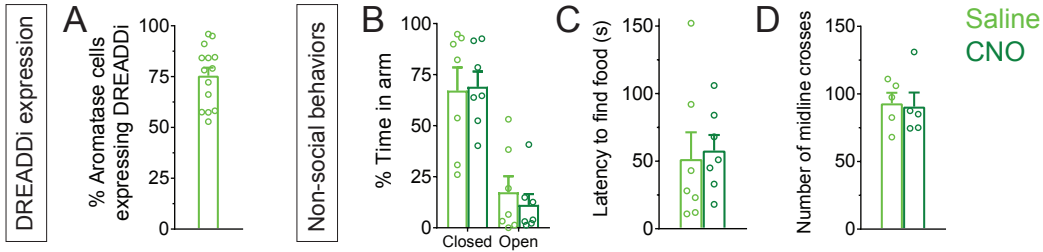

In males expressing mCherry, CNO does not alter mating with females

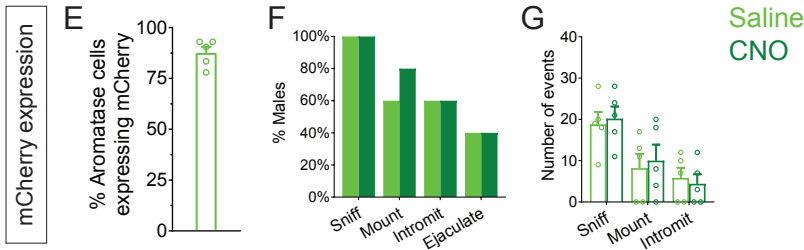

In males, caspase-3 mediated ablation of neurons does not lead to pervasive deficits

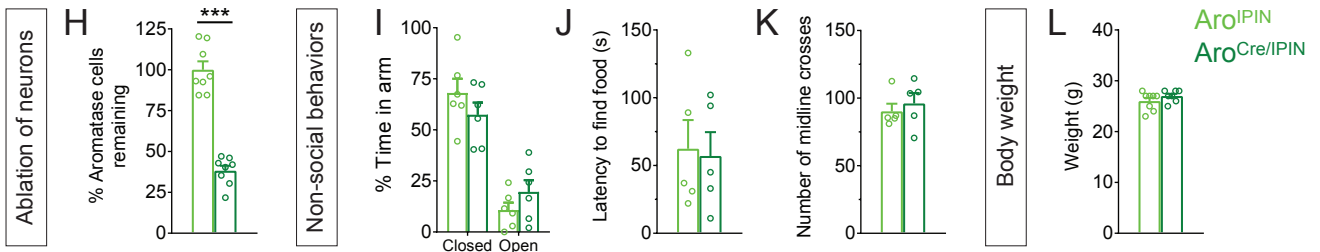

In sexually receptive females, chemogenetic inhibition of neurons does not lead to pervasive deficits

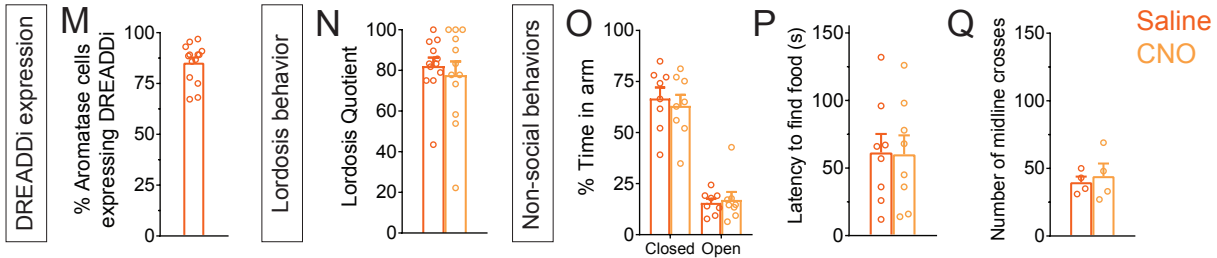

In sexually receptive females, caspase-3 mediated ablation of neurons does not lead to pervasive deficits

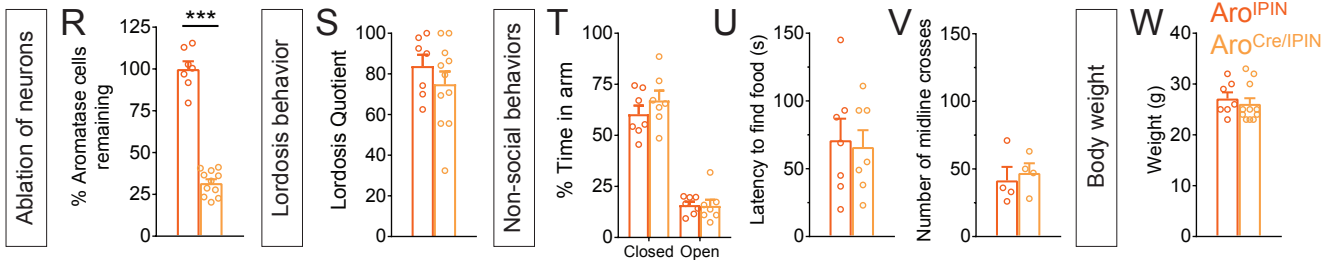

Supplement: NIHMS1517718-supplement-5.pdf [file NIHMS1517718-supplement-5.pdf]
