# Supplementary material
Source: PubMed Central journal article supplement (PMC6453703)

Figure S6

In males expressing mCherry, CNO does not alter aggression toward male intruders

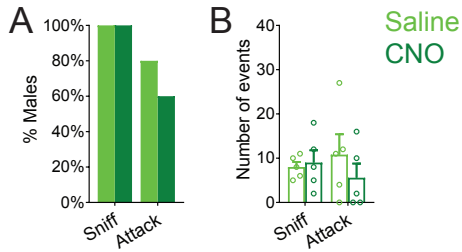

In mothers, chemogenetic inhibition of neurons does not lead to pervasive deficits

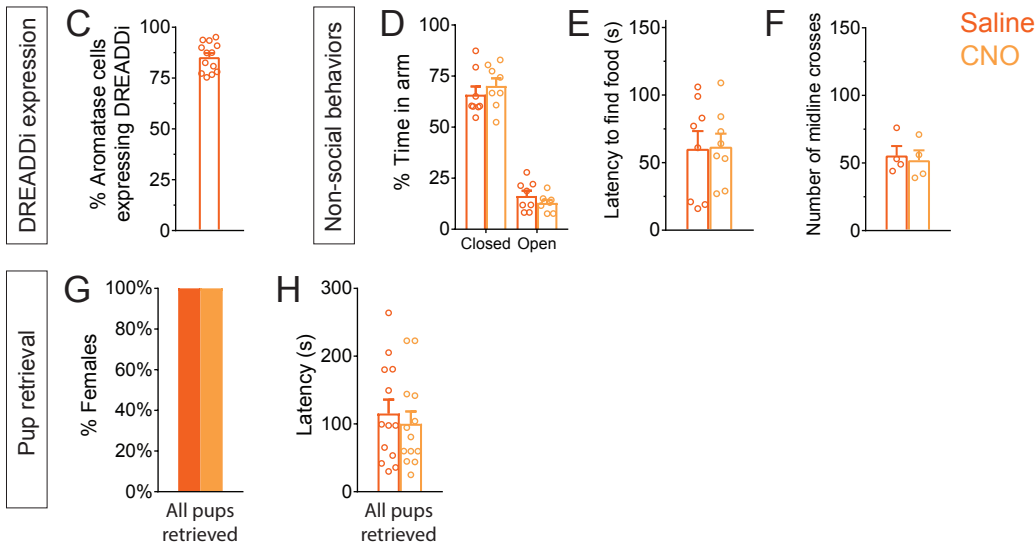

In mothers, caspase-3 mediated ablation of neurons does not lead to pervasive deficits

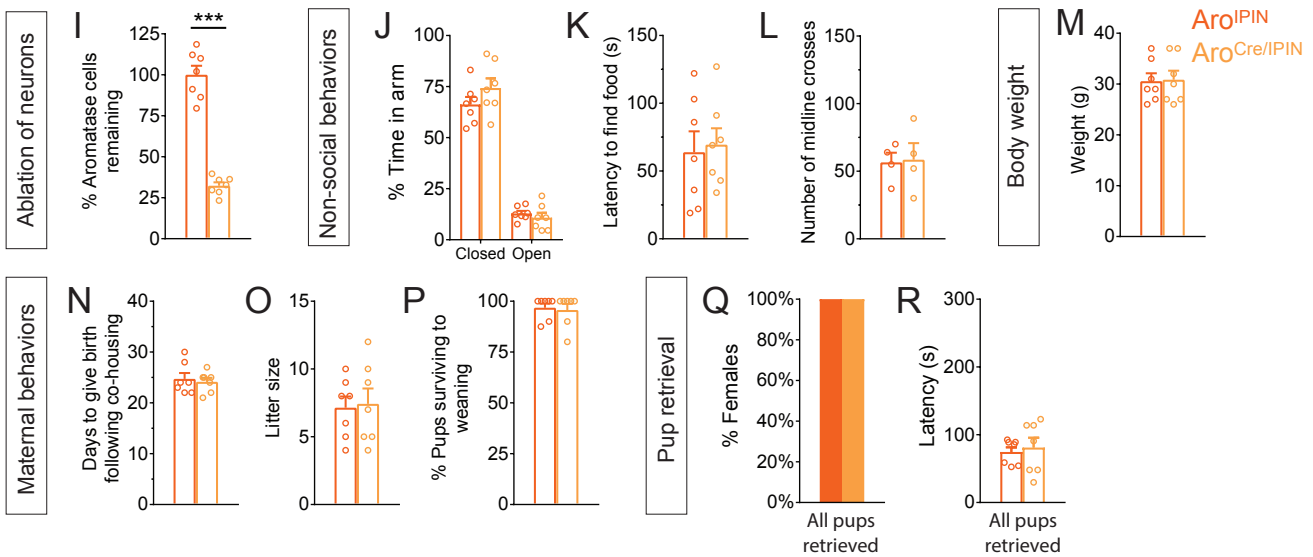

Supplement: NIHMS1517718-supplement-6.pdf [file NIHMS1517718-supplement-6.pdf]
