# Supplementary material
Source: PubMed Central journal article supplement (PMC6453703)

Figure S7

In males, persistent laser illumination of Chr2 expressing neurons

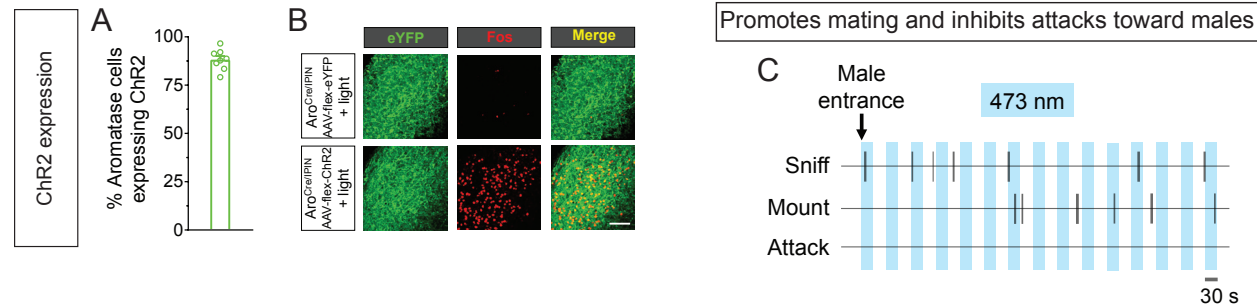

Does not alter mating with female intruders

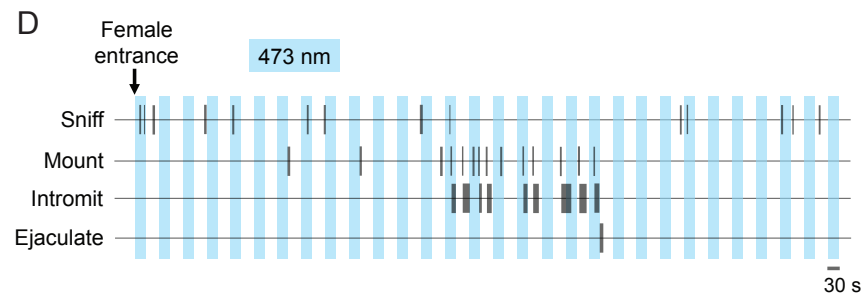

In males expressing eYFP, persistent laser illumination does not alter social interactions

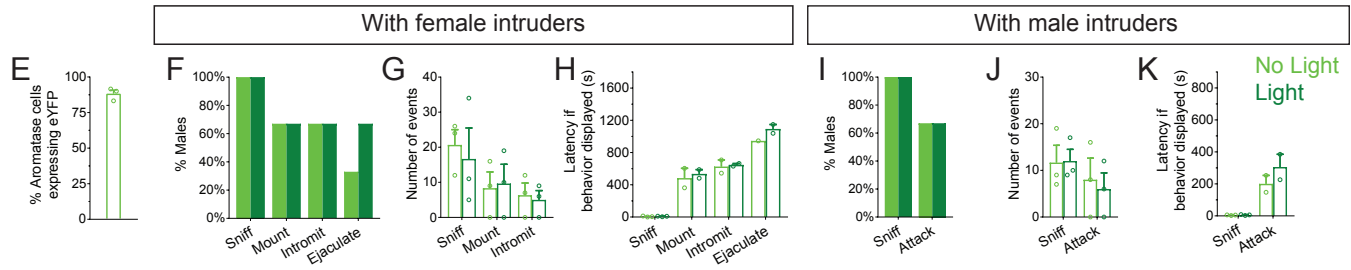

In males, optogenetic manipulation of neurons

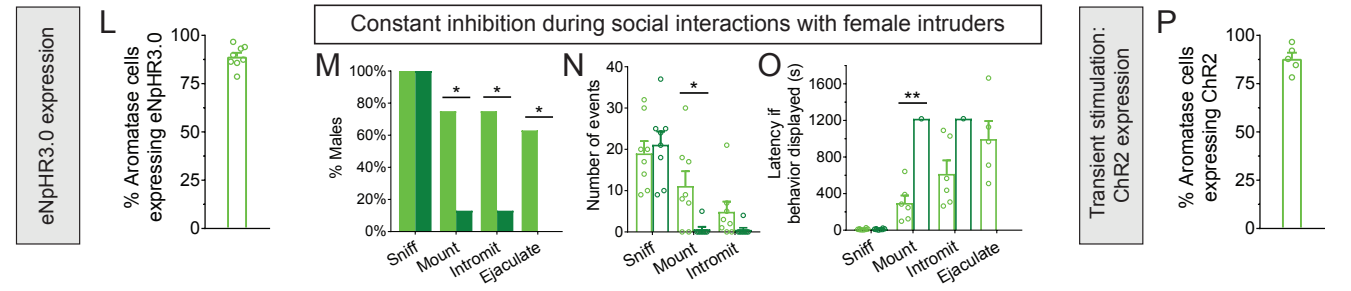

Supplement: NIHMS1517718-supplement-7.pdf [file NIHMS1517718-supplement-7.pdf]
