# Supplementary material
Source: PubMed Central journal article supplement (PMC6453703)

Figure S3

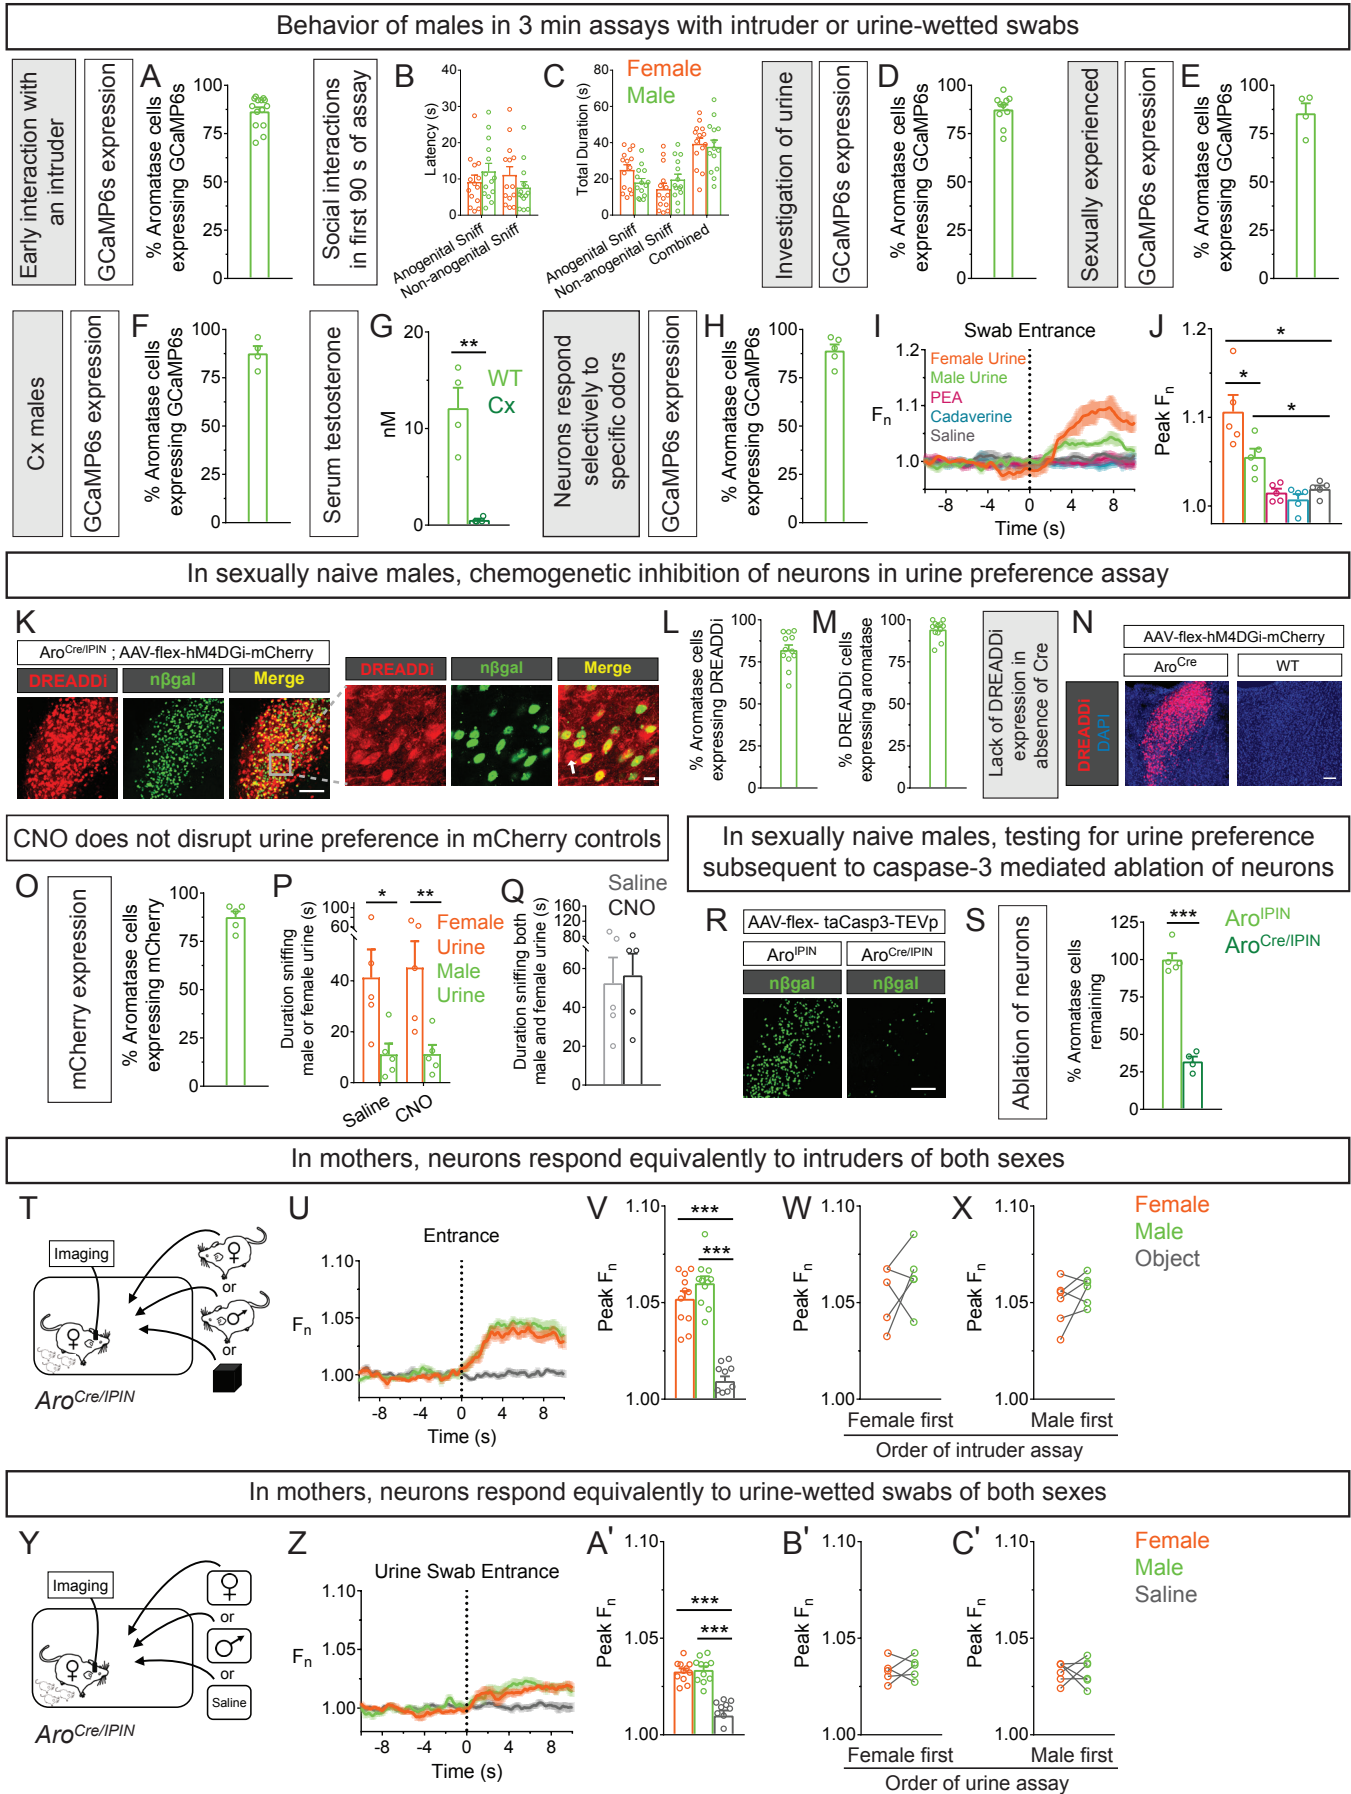

Supplement: NIHMS1517718-supplement-3.pdf [file NIHMS1517718-supplement-3.pdf]

Figure S4

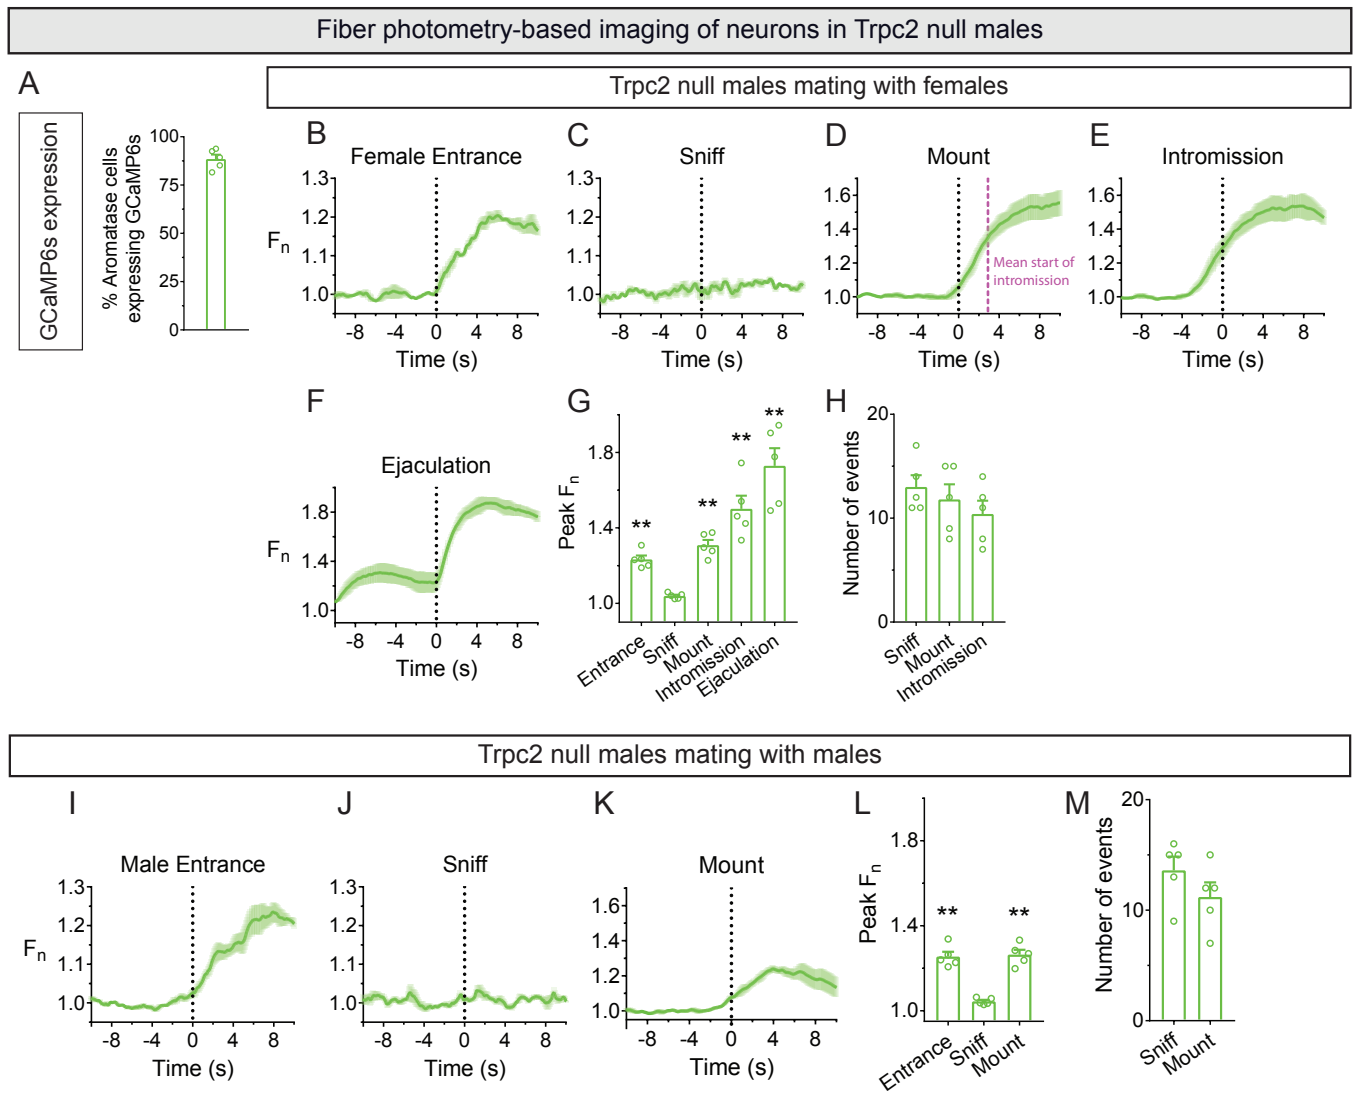

Supplement: NIHMS1517718-supplement-4.pdf [file NIHMS1517718-supplement-4.pdf]
